# Supplementary material
Source: PubMed Central journal article supplement (PMC4761856)
Supplement: Supp_Fig2.pdf [file Supp_Fig2.pdf]

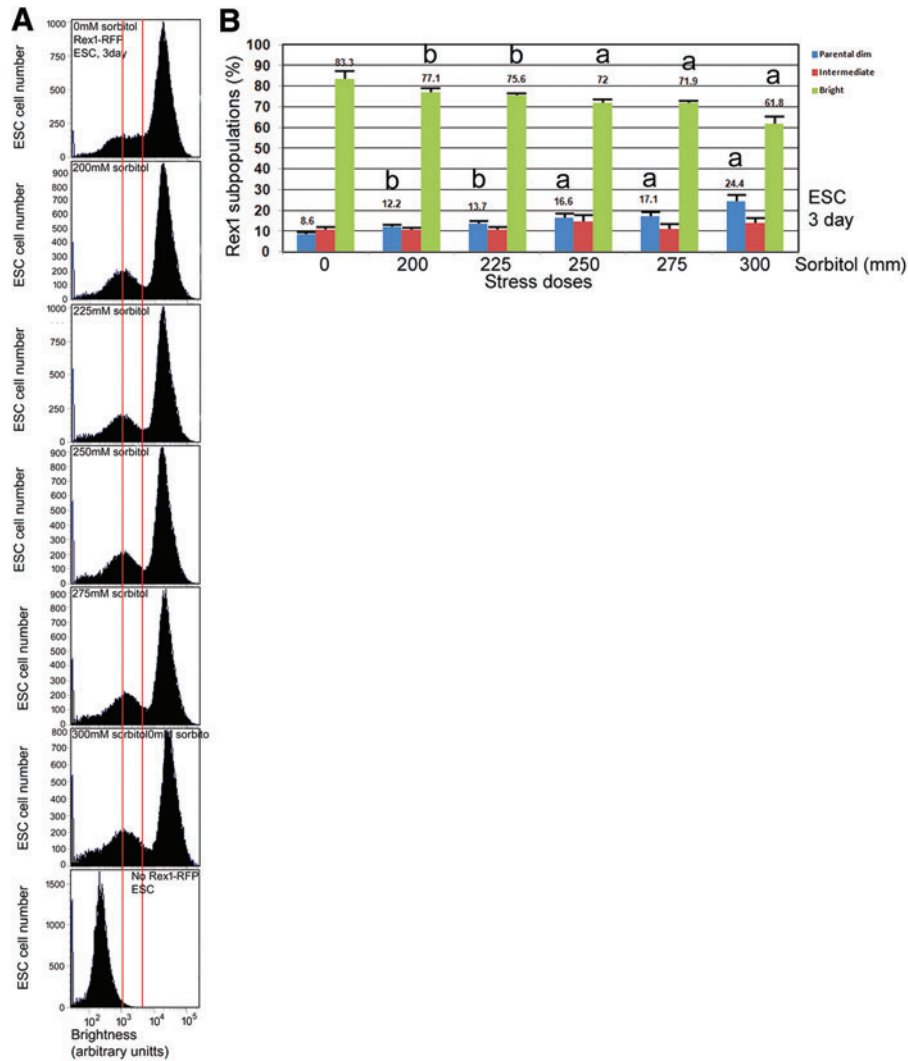

**SUPPLEMENTARY FIG. S2.** Viable Rex1 promoter reporter responds with stress treatment in a dose-dependent manner in flow cytometry assay. mESCs expressing Rex1 promoter reporter were cultured in 12-well plates till 30% confluence. Cells were then treated with 200–300 mM of sorbitol in 25 mM increments for 3 days. After trypsinization, the cell suspensions were subjected to flow cytometry assay. An arbitrary threshold was drawn at  $5 \times 10^3$  on the X-axis and another near the low point between the bright peak and the dimmer peak to its *left* (A). This created three areas of nontransgenic parental ESCs dim at the level of ESCs that do not express Rex1-RFP (see *bottom* graph of the four). Intermediate and bright groups were also defined by the two *vertical red lines*. Area sizes of the two peaks were quantified using Image J. The histogram bars (B) are derived by three independent experiments, one of which is shown in (A), error bars showing SEM, one-way ANOVA was performed followed by Dunnett’s post hoc test using 0 mM as reference for parental dim, intermediate dim, and bright separately. (a) Indicates significant decrease in bright subpopulations and increase in parental dim subpopulations at 250–300 mM sorbitol ( $P < 0.05$ ) and (b) indicates no significance at 200–225 mM sorbitol for changes in Rex1-RFP bright or parental dim subpopulations.
